# Supplementary material for: Genetic Association Analysis of Complex Diseases Incorporating Intermediate Phenotype Information
Source: PLoS One. 2012 Oct 19;7(10):e46612. doi: 10.1371/journal.pone.0046612 (PMC3477105; doi:10.1371/journal.pone.0046612)
Supplement: Text S1 — Inverse variance weighted combination of Z1 and Z2 has global minimum variance value. (DOC) [file pone.0046612.s005.doc]

**Text S1** If *Z*1 and *Z*2 are independent and follow normal distributions,

Z1~N[µ1,V(Z1)], Z2~N[µ2,V(Z2)].

Let

Z=bZ1+(1-b)Z2, 0<b<1,

V(Z)=b2V(Z1)+(1-b)2V(Z2).

V(Z) is a function of b, and the second derivative of V(Z) with respect to b is greater than 0, so V(Z) has a global minimum value.

f’(b)=ǝV(Z)/ǝb=2bV(Z1)-2(1-b)V(Z2)=2b[V(Z1)+V(Z2)]-2V(Z2)

f’’(b)=ǝ2V(Z)/ǝb2=2[V(Z1)+V(Z2)]>0

when f’(b)= 2b[V(Z1)+V(Z2)]-2V(Z2)=0,

b=V(Z2)/(V(Z1)+V(Z2))=1/2

When b = 1/2, V(Z) reaches its minimum, which is 1/2V(Z1).

V(Z)=V(Z1)V(Z2)/(V(Z1)+V(Z2))=1/2V(Z1)
